# Supplementary material for: Primary photodissociation mechanisms of pyruvic acid on S1: observation of methylhydroxycarbene and its chemical reaction in the gas phase
Source: Royal Society of Chemistry journal article supplement (doi:10.1039/d0cp06424f), 2021-01-01
Supplement: d0cp06424f1.pdf [file d0cp06424f1.pdf]

Electronic Supplementary Information

**Primary photodissociation mechanisms of pyruvic acid on S<sub>1</sub>: observation of methylhydroxycarbene and its chemical reaction in the gas phase**

B. R. Samanta,<sup>1</sup> R. Fernando,<sup>1</sup> D. Rösch,<sup>2</sup> H. Reisler<sup>1\*</sup>, and D.L. Osborn<sup>2\*</sup>

<sup>1</sup> Department of Chemistry, University of Southern California, Los Angeles, CA 90089-0482, United States

<sup>2</sup> Combustion Research Facility, Sandia National Laboratories, Livermore, California, 94551-0969, United States

**I. 351 nm fluence dependence of PA photoproducts**

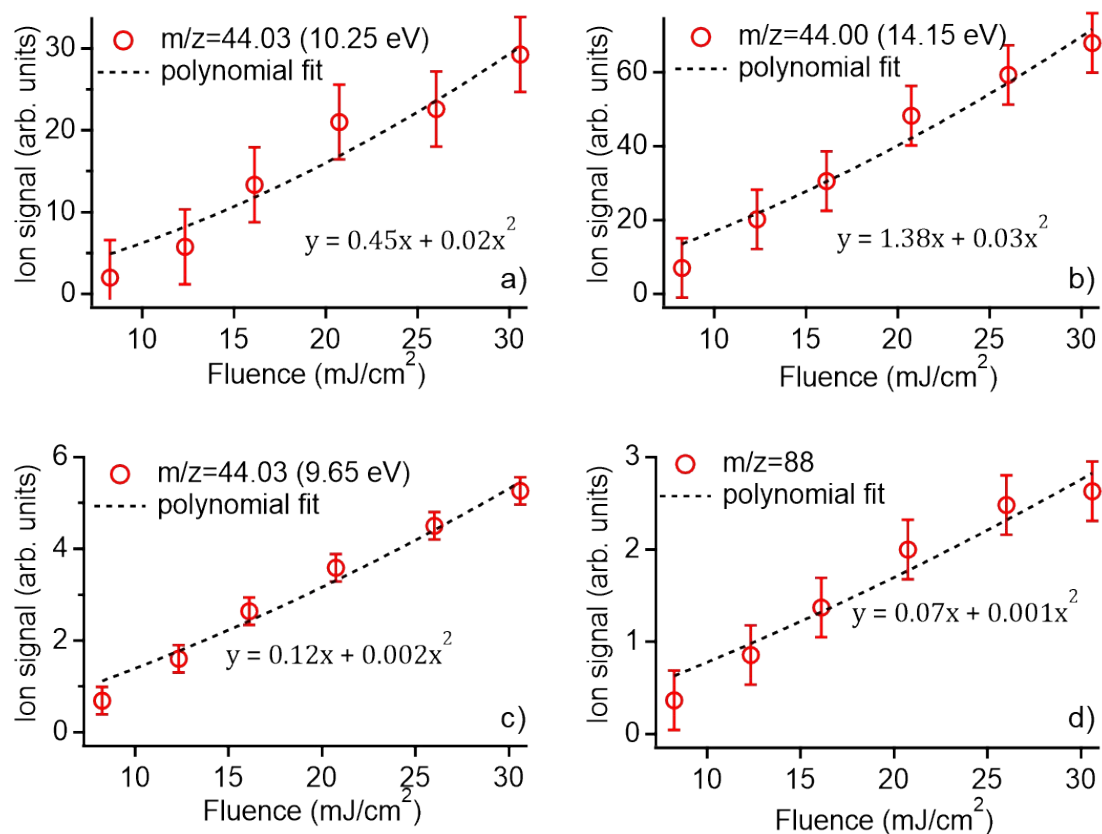

**Figure S1:** Fluence dependent signals of PA photoproducts a) acetaldehyde and vinyl alcohol at 10.25 eV b) vinyl alcohol at 9.65 eV c) CO<sub>2</sub> at 14.15 eV and d) species M at 9.65 eV. The plotted signal intensities fit to a zero-intercept quadratic equation show dominant linear contribution.

## II. 351 nm fluence dependence of radical photoproducts of $d_1$ -PA

Reactive radical species are consumed by wall collisions and/or secondary reactions and their signal intensity as a function of time,  $S_i(t)$ , can be fit to a first- and second-order decay kinetics profile. Equation S1 combines first and second order kinetics, and can be used to fit the nascent signal intensity,  $S_i(t=0)$  for species  $i$ .<sup>1</sup>

$$S_i(t) = \frac{k_1 S_i(t=0)}{(2k' + k_1)e^{k_1 \cdot t} - 2k'} \quad (\text{S1})$$

Here  $k_1$  is the rate constant representing the sum of all first order losses (including wall-loss), and  $k' = \sum k_2 \cdot [J]_{t=0}$  represents the sum of all second order reactions where  $J$  is any species with which the product reacts, including self-reaction.

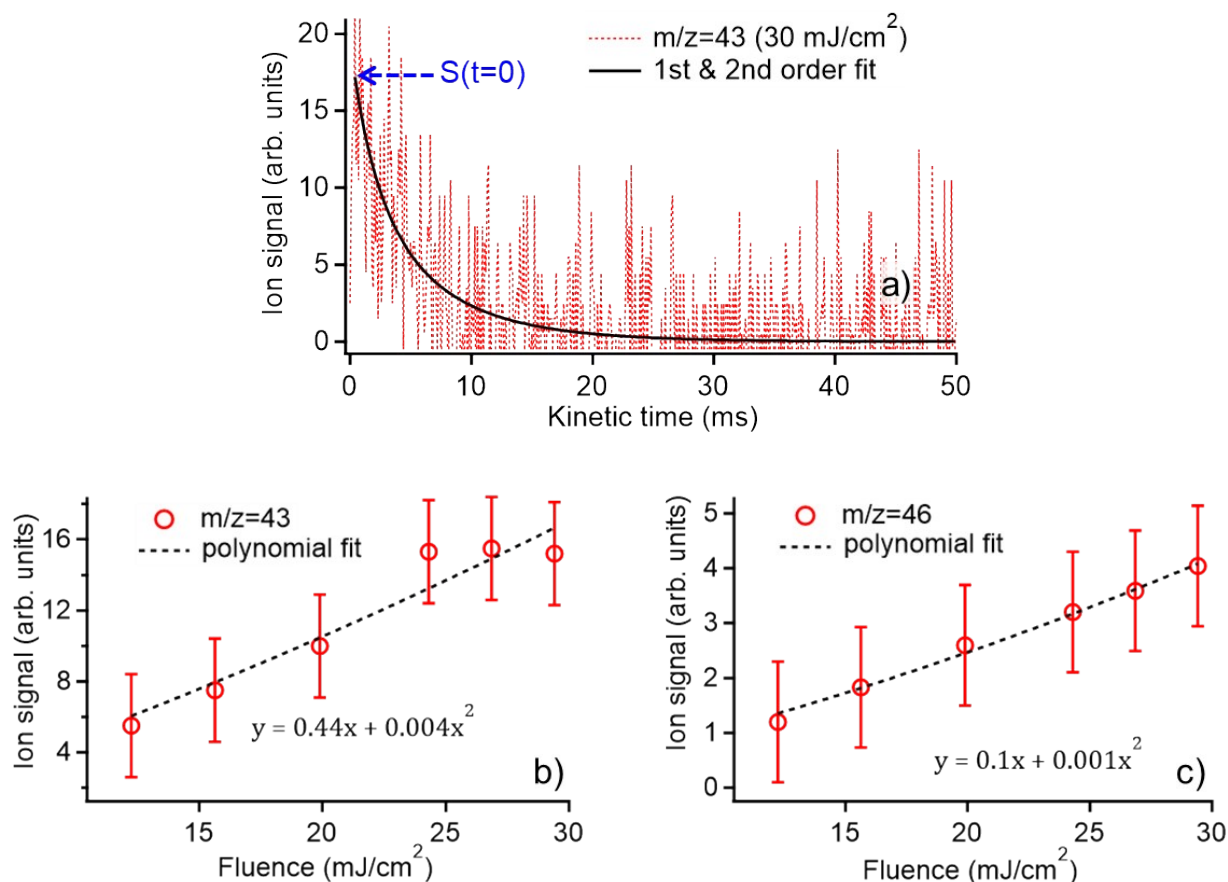

**Figure S2:** a) The signal intensities of unstable free radical species, obtained at 9.65 eV from  $d_1$ -PA photolysis, are extrapolated using equation S1 for  $m/z=43$ , as shown. The extrapolated signal intensities are plotted as a function of fluence for b)  $\text{CH}_3\text{CO}$  and c)  $\text{DOCOCO}$  radicals. The plotted signal intensities fit to a zero-intercept quadratic equation.

### III. Photoionization spectra of species M

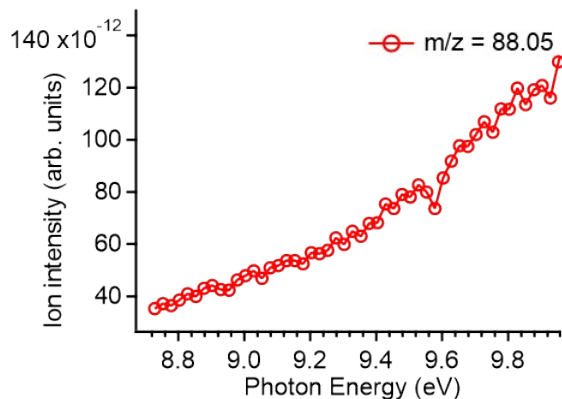

**Figure S3:** Photoionization spectra of species M ( $m/z = 88.05$ ), a photoproduct of PA dissociation at 351 nm, in the 8.7 – 9.9 eV region.

### IV. PA thermochemistry

Table S1: Summary of thermochemical values utilized in this work. Uncertainty in the values are less than 1 kcal mol<sup>-1</sup>.

| Thermodynamic entity (at 0 K)                            | (kcal mol <sup>-1</sup> ) | Source                                |
|----------------------------------------------------------|---------------------------|---------------------------------------|
| $\Delta H_f^0(\text{PA})$                                | $-124.52 \pm 0.55$        | Emel'yanenko et al. 2018 <sup>2</sup> |
| $\Delta H_f^0(\text{CH}_3\text{CHO})$                    | $-37.08 \pm 0.06$         | ATcT <sup>3</sup>                     |
| $\Delta H_f^0(\text{H}_2\text{C}=\text{CHOH})$           | $-26.95 \pm 0.16$         | ATcT <sup>3</sup>                     |
| $\Delta H_f^0(\text{CO}_2)$                              | $-93.955 \pm 0.004$       | ATcT <sup>3</sup>                     |
| $\Delta H_f^0(\text{CH}_3\text{CO})$                     | $-0.80 \pm 0.08$          | ATcT <sup>3</sup>                     |
| $\Delta H_f^0(\text{trans-HOCO})$                        | $-43.28 \pm 0.11$         | ATcT <sup>3</sup>                     |
| $\Delta H_f^0(\text{CH}_3\text{COOH})$                   | $-100.11 \pm 0.10$        | ATcT <sup>3</sup>                     |
| $\Delta H_f^0(\text{CO})$                                | $-27.200 \pm 0.006$       | ATcT <sup>3</sup>                     |
| $\Delta H(\text{Ac} \rightarrow \text{MHC})$             | $50.5 \pm 0.8$            | da Silva 2016 <sup>4</sup>            |
| $\Delta E_{\text{adiab}}(\text{PA}; S_1 \leftarrow S_0)$ | $76.37 \pm 0.03$          | Sutradhar et al. 2019 <sup>5</sup>    |
| $\Delta E_{\text{adiab}}(\text{PA}; S_1 \leftarrow T_1)$ | 6.0                       | da Silva <sup>6</sup>                 |

## V. References

1. E. V. Shafir, I. R. Slagle and V. D. Knyazev, *J. Phys. Chem. A*, 2003, **107**, 8893-8903.
2. V. N. Emel'yanenko, V. V. Turovtsev and Y. A. Fedina, *Thermochim. Acta*, 2018, **665**, 70-75.
3. B. Ruscic and D. Bross, Active Thermochemical Tables (ATcT) values based on ver. 1.122p of the Thermochemical, ATcT.anl.gov, (accessed January, 2020).
4. G. da Silva, *J. Phys. Chem. A*, 2016, **120**, 276-283.
5. S. Sutradhar, B. R. Samanta, R. Fernando and H. Reisler, *J. Phys. Chem. A*, 2019, **123**, 5906-5917.
6. G. da Silva, personal communication.
7. B. R. Samanta, S. Sutradhar, R. Fernando, A. I. Krylov and H. Reisler, *J. Phys. Chem. A*, 2018, **122**, 6176-6182.
8. P. R. Schreiner, H. P. Reisenauer, D. Ley, D. Gerbig, C.-H. Wu and W. D. Allen, *Science*, 2011, **332**, 1300-1303.
9. M. H. Matus, M. T. Nguyen and D. A. Dixon, *J. Phys. Chem. A*, 2006, **110**, 8864-8871.
